# Supplementary material
Source: PubMed Central journal article supplement (PMC9135028)

**Supplemental Material S2.** Density plots and receiver operating characteristic curves for Noun Phrase Assembly Scale. The upper panel displays the conditional distribution of the typically developing group (solid line) and the late takers (dashed line). True positive rate (TPR) and false positive rate (FPR) for the cutoff score is  $-2$  standard deviation from the expected mean of the typically developing children. The lower panel displays the receiver operation characteristic curves along with the possible cutoff score that would yield a 0.8 true positive rate. The false positive rate for the score is also presented. Note that this scale score is only effective until 36 months old, with a minimum false positive rate of 0.4.

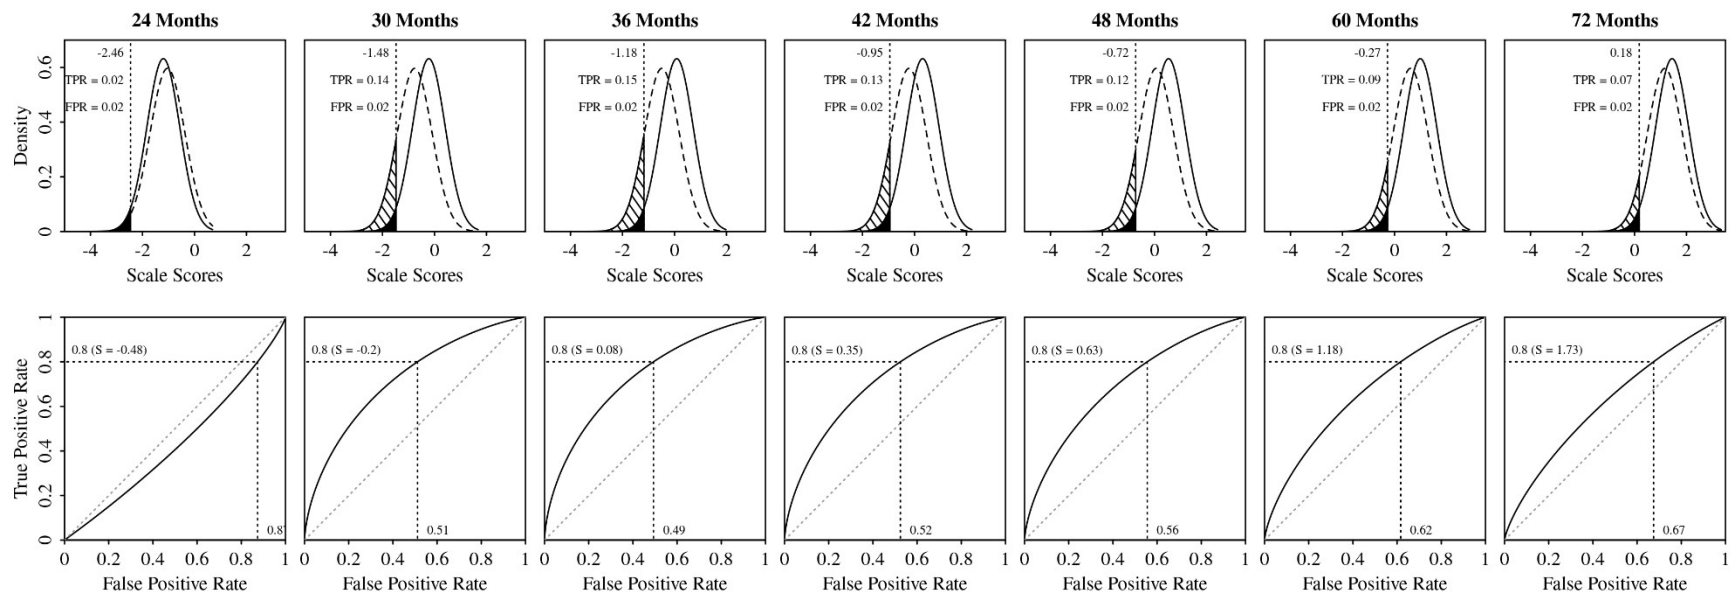

Supplement: AJSLP-31-239-s002.pdf [file AJSLP-31-239-s002.pdf]
