# Supplementary material
Source: PubMed Central journal article supplement (PMC9135028)

**Supplemental Material S3.** Density plots and receiver operating characteristic curves for Verb Phrase Assembly Scale. The upper panel displays the conditional distribution of the typically developing group (solid line) and the late takers (dashed line). True positive rate (TPR) and false positive rate (FPR) for the cutoff score is  $-2$  standard deviations from the expected mean of the typically developing children. The lower panel displays the receiver operation characteristic curves along with the possible cutoff score that would yield a 0.8 true positive rate. The false positive rate for the score is also presented. Note that this scale score performs best between 30 to 42 months, with a minimum false positive rate of 0.5. For 24 month-old children, the expected distribution between the two groups is basically identical.

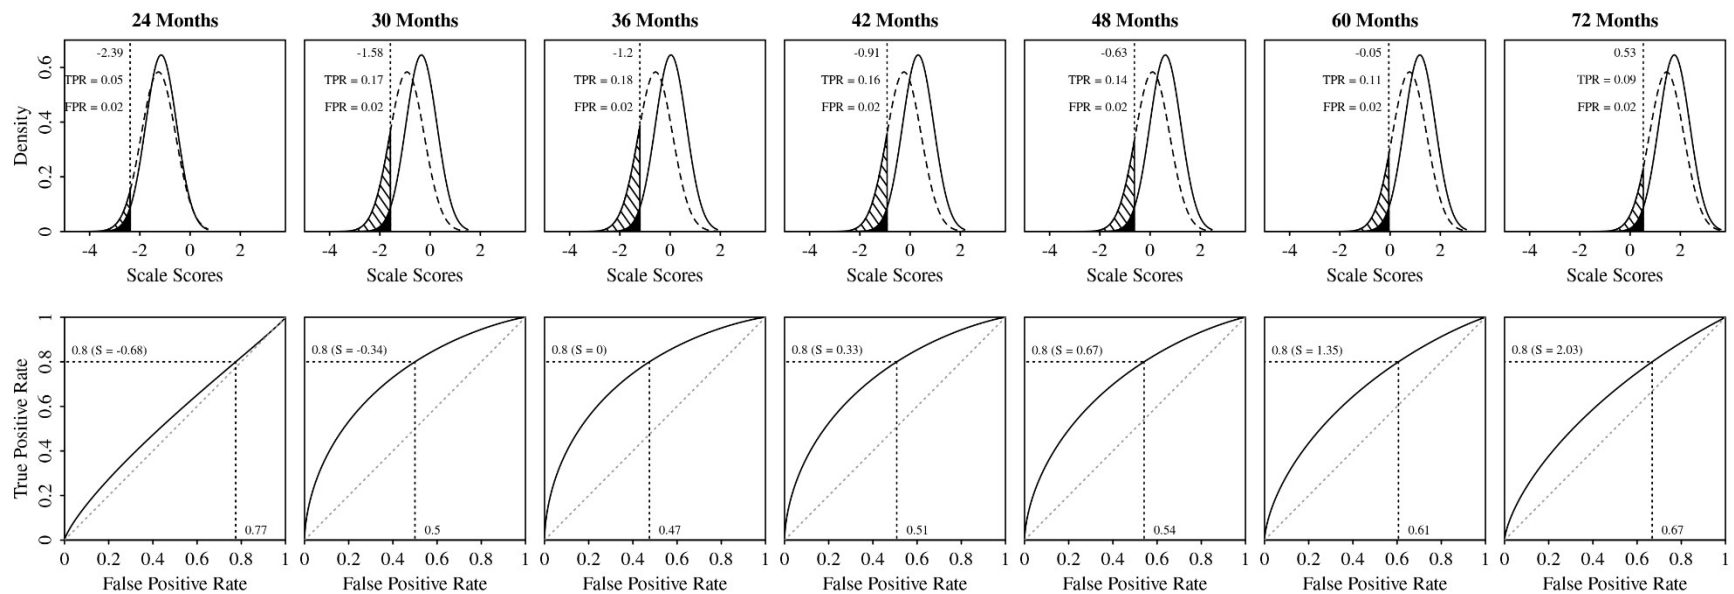

Supplement: AJSLP-31-239-s003.pdf [file AJSLP-31-239-s003.pdf]
